# Supplementary material
Source: PubMed Central journal article supplement (PMC4178434)
Supplement: ASN.2013070758_ASN2013070758SupplementaryData.pdf [file ASN.2013070758_ASN2013070758SupplementaryData.pdf]

Supplementary Table 1. Characteristics of microbead-based plasma KIM-1 sandwich ELISA in various species.

| <b>Parameters</b>           | <b>Human</b>                  | <b>Mouse</b>                  | <b>Rat</b>                      |
|-----------------------------|-------------------------------|-------------------------------|---------------------------------|
| Lower limit of quantitation | 4.4 pg/mL                     | 12.1 pg/mL                    | 39 pg/mL                        |
| Assay range                 | 0.012–50 ng/mL                | 0.012–50 ng/mL                | 0.039–50 ng/mL                  |
| Intra assay %CV             | <11.45%                       | <10.15%                       | <11.4%                          |
| Inter assay %CV             | <12.3%                        | <9.8%                         | <13.7%                          |
| Recovery                    | 87-115%                       | 84-110%                       | 85 - 125 %                      |
| Linearity                   | Linear dilutions:<br>1:8-1:32 | Linear dilutions:<br>1:4-1:32 | Linear dilutions:<br>1:5 - 1:20 |

CV=coefficient of variation

Supplementary Table 2. Demographics, serum creatinine, urine albumin, and urinary and plasma KIM-1 values in healthy volunteers and patients

| Subject | Group | Age / sex / race | Baseline | SCr on day of collection (mg/dL) | Plasma KIM-1 (pg/mL) | Urine KIM-1 (ng/mg uCr) | Urine KIM-1 (ng/ml) | Albuminuria (mg/g uCr) |
|---------|-------|------------------|----------|----------------------------------|----------------------|-------------------------|---------------------|------------------------|
| 1       | HV    | 32 / F / A       | -        | 0.79                             | 101.65               | 0.47                    | 0.058               | 2.1                    |
| 2       | HV    | 40 / M / A       | -        | 0.88                             | 16.51                | 0.49                    | 0.265               | 3.0                    |
| 3       | HV    | 20 / M / B       | -        | 1.07                             | 53.29                | 0.07                    | 0.115               | 4.0                    |
| 4       | HV    | 21 / M / A       | -        | 0.97                             | 86.44                | 0.23                    | 0.073               | 2.2                    |
| 5       | HV    | 44 / M / B       | -        | 1.12                             | 65.27                | 0.07                    | 0.038               | 10.2                   |
| 6       | HV    | 21 / M / A       | -        | 0.87                             | 46.37                | 0.44                    | 0.178               | 8.1                    |
| 7       | HV    | 35 / F / B       | -        | 0.76                             | 140.27               | 0.07                    | 0.005               | 0.3                    |
| 8       | HV    | 48 / M / B       | -        | 1.11                             | 18.53                | 0.11                    | 0.059               | 3.5                    |
| 9       | HV    | 45 / F / A       | -        | 0.85                             | 36.43                | 0.23                    | 0.164               | 4.1                    |
| 10      | HV    | 39 / F / A       | -        | 0.85                             | 46.37                | 0.41                    | 0.396               | 10.6                   |
| 11      | HV    | 33 / M / B       | -        | 1.04                             | 49.59                | 0.13                    | 0.063               | 4.2                    |
| 12      | HV    | 37 / M / A       | -        | 0.87                             | 29.53                | 0.23                    | 0.054               | 2.1                    |
| 13      | HV    | 21 / F / A       | -        | 0.83                             | 29.53                | 0.14                    | 0.112               | 0.4                    |
| 14      | HV    | 26 / F / W       | -        | 1.04                             | 59.08                | 0.22                    | 0.322               | 0                      |
| 15      | HV    | 25 / F / W       | -        | 0.9                              | 33.01                | 0.19                    | 0.064               | 2.0                    |
| 16      | HV    | 42 / M / W       | -        | 0.89                             | 240.03               | 0.24                    | 0.129               | 1.1                    |
| 17      | HV    | 33 / M / W       | -        | 1.05                             | 118.21               | 0.28                    | 0.202               | 2.0                    |
| 18      | HV    | 50 / M / W       | -        | 1.11                             | 12.98                | 0.37                    | 0.317               | 11.1                   |
| 19      | HV    | 24 / M / W       | -        | 0.99                             | 106.52               | 0.10                    | 0.099               | 0                      |
| 20      | HV    | 32 / F / B       | -        | 0.76                             | 77.39                | 0.17                    | 0.019               | 0                      |
| 21      | HV    | 29 / M / A       | -        | 0.98                             | 20.48                | 0.16                    | 0.123               | 3.28                   |
| 22      | HV    | 28 / M / B       | -        | 1.01                             | 34.56                | 0.10                    | 0.119               | 3.38                   |
| 23      | HV    | 46 / M / B       | -        | 0.98                             | 123.67               | 0.14                    | 0.382               | 5.09                   |
| 24      | HV    | 28 / F / B       | -        | 0.98                             | 113.12               | 0.11                    | 0.197               | 5.24                   |
| 25      | HV    | 43 / M / B       | -        | 0.99                             | 34.45                | 0.17                    | 0.175               | 3.61                   |
| 26      | HV    | 45 / M / W       | -        | 0.95                             | 67.23                | 0.56                    | 1.608               | 22.29                  |
| 27      | HV    | 46 / M / W       | -        | 1                                | 33.32                | 0.24                    | 0.191               | 2.26                   |
| 28      | HV    | 42 / M / W       | -        | 1                                | 156.76               | 0.20                    | 0.236               | 2.22                   |
| 29      | HV    | 19 / F / W       | -        | 0.56                             | 33.45                | 0.41                    | 1.138               | 3.30                   |

|    |             |            |      |      |         |      |       |        |
|----|-------------|------------|------|------|---------|------|-------|--------|
| 30 | HV          | 35 / M / W | -    | 0.87 | 29.67   | 0.10 | 0.199 | 17.70  |
| 31 | HV          | 31 / F / B | -    | 0.67 | 89.65   | 0.26 | 0.416 | 2.65   |
| 32 | HV          | 23 / F / W | -    | 0.73 | 18.47   | 0.28 | 0.009 | 49.52  |
| 33 | HV          | 25 / F / W | -    | 0.76 | 88.97   | 1.52 | 1.600 | 1.73   |
| 34 | HV          | 25 / F / W | -    | 0.8  | 65.78   | 0.27 | 0.516 | 4.33   |
| 35 | HV          | 48 / F / W | -    | 0.9  | 33.67   | 0.60 | 0.675 | 3.29   |
| 36 | HV          | 26 / F / W | -    | 0.76 | 98.65   | 0.12 | 0.291 | 2.86   |
| 37 | HV          | 30 / F / B | -    | 0.96 | 36.89   | 0.16 | 0.370 | 1.72   |
| 38 | HV          | 30 / M / W | -    | 0.72 | 12.86   | 0.35 | 0.683 | 6.01   |
| 39 | HV          | 27 / F / A | -    | 0.71 | 11.98   | 0.43 | 0.534 | 4.08   |
| 40 | HV          | 36 / M / A | -    | 0.78 | 98.34   | 0.24 | 0.148 | 4.52   |
| 41 | HV          | 35 / F / M | -    | 0.86 | 101.55  | 0.22 | 0.520 | 2.13   |
| 42 | HV          | 27 / F / W | -    | 0.71 | 47.89   | 0.35 | 1.164 | 2.84   |
| 43 | HV          | 20 / M / A | -    | 0.97 | 101.23  | 0.37 | 0.393 | 1.71   |
| 44 | HV          | 20 / F / W | -    | 0.69 | 111.32  | 0.34 | 1.256 | 1.58   |
| 45 | HV          | 49 / F / B | -    | 0.95 | 78.53   | 0.27 | 0.764 | 9.37   |
| 46 | HV          | 43 / M / A | -    | 0.99 | 17.87   | 0.37 | 0.719 | 2.46   |
| 47 | HV          | 51 / F / B | -    | 0.98 | 46.78   | 0.29 | 0.880 | 6.21   |
| 48 | HV          | 41 / F / B | -    | 0.53 | 16.37   | 0.48 | 0.645 | 3.71   |
| 49 | CS - no AKI | 77 / F / W | 0.9  | 0.73 | 123.34  | 1.55 | 0.540 | 35.0   |
| 50 | CS - no AKI | 75 / M / W | 1.31 | 1.04 | 957.70  | 0.69 | 0.389 | 53.8   |
| 51 | CS - no AKI | 79 / M / W | 1.4  | 1.12 | 243.26  | 0.47 | 0.214 | 45.0   |
| 52 | CS - no AKI | 76 / M / W | 1.21 | 0.84 | 37.92   | 0.72 | 0.530 | 23.6   |
| 53 | CS - no AKI | 58 / M / W | 1.12 | 1.25 | 14.64   | 0.88 | 0.862 | 429.94 |
| 54 | CS - no AKI | 83 / M / W | 0.94 | 0.93 | 26.49   | 1.38 | 0.803 | 0      |
| 55 | CS - no AKI | 83 / F / W | 1.27 | 0.98 | 108.00  | 0.52 | 0.199 | 3.52   |
| 56 | CS - no AKI | 76 / M / W | 1.49 | 1.55 | 123.34  | 0.98 | 0.323 | 10.6   |
| 57 | CS - no AKI | 69 / M / W | 2.25 | 1.9  | 14.64   | 0.44 | 0.262 | 231.13 |
| 58 | CS - no AKI | 78 / M / W | 0.98 | 0.83 | 339.58  | 0.47 | 0.214 | 20.1   |
| 59 | CS - no AKI | 78 / F / W | 1.33 | 1.07 | 164.03  | 0.82 | 0.433 | 88.1   |
| 60 | CS - no AKI | 82 / F / W | 1.15 | 0.94 | 60.06   | 0.97 | 0.980 | 31.0   |
| 61 | CS - no AKI | 57 / F / W | 1.03 | 0.81 | 253.01  | 0.88 | 1.243 | 59.38  |
| 62 | CS - no AKI | 84 / F / W | 2.27 | 1.8  | 81.56   | 0.67 | 0.671 | 31.0   |
| 63 | CS - no AKI | 59 / M / W | 1.45 | 1.38 | 17.12   | 0.75 | 0.199 | 2.0    |
| 64 | CS - no AKI | 67 / M / H | 1.15 | 1.23 | 727.00  | 0.16 | 0.540 | 82.56  |
| 65 | CS - AKI    | 81 / M / W | 1    | 2.23 | 2831.71 | 1.69 | 0.376 | 30.05  |

|    |           |             |      |      |          |       |        |       |
|----|-----------|-------------|------|------|----------|-------|--------|-------|
| 66 | CS - AKI  | 67 / M / W  | 1.49 | 3.11 | 184.07   | 0.95  | 0.549  | 406   |
| 67 | CS - AKI  | 64 / M / W  | 2.2  | 5    | 15579.65 | 7.47  | 5.429  | 400   |
| 68 | CS - AKI  | 63 / F / W  | 1.03 | 2.08 | 663.37   | 2.28  | 2.11   | 230   |
| 69 | CS - AKI  | 56 / M / W  | 1.82 | 4.1  | 6334.09  | 20.54 | 14.540 | 209   |
| 70 | CS - AKI  | 71 / M / W  | 1.08 | 2.9  | 971.10   | 5.31  | 2.752  | 202   |
| 71 | ICU - AKI | 41 / M / W  | 0.9  | 4.21 | 922.42   | 3.42  | 0.487  | 120   |
| 72 | ICU - AKI | 62 / M / W  | 1    | 4.05 | 1019.23  | 6.74  | 4.671  | 368   |
| 73 | ICU - AKI | 75 / M / W  | 1    | 2.8  | 663.37   | 1.20  | 0.352  | 100.4 |
| 74 | ICU - AKI | 78 / M / W  | 0.8  | 3.05 | 572.40   | 1.25  | 1.275  | 45.7  |
| 75 | ICU - AKI | 80 / M / W  | 0.7  | 2.47 | 60.06    | 2.72  | 1.186  | 56.4  |
| 76 | ICU - AKI | 74 / M / W  | 1.3  | 2.23 | 771.32   | 20.32 | 24.528 | 368   |
| 77 | CS - AKI  | 70 / M / W  | 1.74 | 2.7  | 284.81   | 7.49  | 6.444  | 298.0 |
| 78 | CS - AKI  | 85 / F / B  | 0.95 | 1.35 | 311.24   | 0.87  | 0.958  | 35.1  |
| 79 | CS - AKI  | 89 / F / W  | 1.18 | 2.14 | 403.11   | 4.93  | 1.822  | 82.8  |
| 80 | CS - AKI  | 84 / F / W  | 0.87 | 1.6  | 184.81   | 0.82  | 1.571  | 105.6 |
| 81 | CS - AKI  | 82 / M / W  | 1.32 | 2.23 | 544.74   | 1.68  | 5.785  | 20.9  |
| 82 | CS - AKI  | 90 / F / W  | 1.3  | 2.27 | 184.81   | 2.68  | 2.436  | 176.0 |
| 83 | CS - AKI  | 96 / F / W  | 1.14 | 2    | 403.11   | 3.12  | 1.654  | 115.5 |
| 84 | CS - AKI  | 56 / M / HW | 2.6  | 4.01 | 258.64   | 9.76  | 3.416  | 811.4 |
| 85 | CS - AKI  | 80 / M / W  | 0.66 | 1.4  | 1027.26  | 10.97 | 2.961  | 572.0 |
| 86 | CS - AKI  | 72 / M / W  | 1.52 | 2.5  | 258.64   | 5.54  | 8.535  | 14.2  |
| 87 | CS - AKI  | 60 / F / W  | 1.22 | 2.21 | 331.31   | 1.94  | 0.564  | 110.3 |
| 88 | CS - AKI  | 79 / F / W  | 0.82 | 1.57 | 544.74   | 2.99  | 1.437  | 43.1  |
| 89 | CS - AKI  | 83 / M / W  | 2.1  | 2.52 | 3291.32  | 28.96 | 6.949  | 169.8 |
| 90 | CS - AKI  | 78 / M / W  | 1.19 | 2.6  | 518.15   | 3.48  | 1.183  | 74.5  |
| 91 | CS - AKI  | 82 / F / W  | 0.89 | 1.68 | 412.31   | 1.76  | 0.810  | 65.6  |
| 92 | CS - AKI  | 77 / F / W  | 0.7  | 1.24 | 1293.48  |       |        |       |

Abbreviations: A, Asian; AKI, acute kidney injury; B, Black; CS, cardiac surgery; ICU, intensive care unit; HW, Hispanic White; M, Multi-racial; W, White.

Supplementary Table 3. Biomarker values in patients undergoing cardiac surgery.

|          | Plasma KIM-1 (pg/mL)            |                               |                       | Urinary KIM-1 (ng/mg uCr)         |                                  |                       | Urinary albumin (mg/g uCr)    |                               |                    |
|----------|---------------------------------|-------------------------------|-----------------------|-----------------------------------|----------------------------------|-----------------------|-------------------------------|-------------------------------|--------------------|
|          | AKI<br>Median (IQR)<br>[N]      | No AKI<br>Median<br>(IQR) [N] | AUC-ROC               | AKI<br>Median (IQR) [N]           | No AKI<br>Median (IQR) [N]       | AUC-ROC               | AKI<br>Median (IQR)<br>[N]    | No AKI<br>Median<br>(IQR) [N] | AUC-ROC            |
| Pre      | 128.8 (41.9,<br>167.5)<br>[8]   | 82.0 (49.8,<br>154.4)<br>[5]  | 0.55 (0.26 -<br>0.82) | 505.2 (398.6,<br>1531.9)<br>[8]   | 358.4 (150.2,<br>682.9)<br>[5]   | 0.73 (0.42 -<br>0.93) | 120.9 (27.8,<br>137.5)<br>[6] | 67.0 (14.0,<br>128.0)<br>[5]  | 0.63 (0.31 - 0.89) |
| End      | 97.5 (41.7,<br>134.4)<br>[7]    | 76.9 (42.4,<br>100.2)<br>[9]  | 0.51 (0.25 -<br>0.76) | 1499.3 (956.0,<br>2047.4)<br>[7]  | 503.1 (341.9,<br>1041.3)<br>[9]  | 0.81 (0.54 -<br>0.96) | 85.9 (23.3,<br>150.3)<br>[5]  | 27.1 (13.3,<br>96.8)<br>[9]   | 0.67 (0.37 - 0.89) |
| 4h       | 90.5 (52.3,<br>133.5)<br>[8]    | 86.2 (51.5,<br>107.6)<br>[7]  | 0.59 (0.31 -<br>0.83) | 444.6 (376.7,<br>1038.7)<br>[9]   | 585.7 (313.9,<br>643.1)<br>[7]   | 0.52 (0.27 -<br>0.77) | 30.5 (13.5,<br>127.8)<br>[7]  | 19.9 (15.6,<br>33.9)<br>[7]   | 0.65 (0.36 - 0.88) |
| 12h      | -                               | -                             | -                     | 972.9 (511.8,<br>1511.9)<br>[8]*  | 1033.6 (871.6,<br>2050.1)<br>[8] | 0.61 (0.34 -<br>0.84) | 44.2 (19.3,<br>64.9)<br>[6]   | 32.4 (12.1,<br>41.8)<br>[8]   | 0.67 (0.37 - 0.89) |
| Day<br>1 | 114.2 (58.1,<br>167.2)<br>[8]   | 81.3 (62.3,<br>120.5)<br>[8]  | 0.55 (0.29 -<br>0.79) | 1464.0 (1198.3,<br>2055.8)<br>[9] | 1069.6 (608.3,<br>1646.8)<br>[7] | 0.65 (0.38 -<br>0.87) | 52.3 (42.2,<br>92.0)<br>[7]   | 48.6 (18.7,<br>68.5)<br>[7]   | 0.71 (0.42 - 0.92) |
| Day<br>2 | 230.2 (160.7,<br>365.1)<br>[9]* | 103.9 (70.0,<br>155.1)<br>[9] | 0.74 (0.48 -<br>0.91) | 3643.1 (1355.0,<br>5092.8)<br>[9] | 991.2 (532.6,<br>1487.2)<br>[8]  | 0.89 (0.64 -<br>0.99) | 72.7 (47.9,<br>213.2)<br>[7]  | 46.8 (24.8,<br>52.4)<br>[8]   | 0.77 (0.49 - 0.94) |
| Day<br>3 | 241.1 (144.7,<br>447.5) [8]     | 125.3 (59.5,<br>169.6)<br>[9] | 0.78 (0.52 -<br>0.94) | 1570.6 (1017.3,<br>4101.7)<br>[8] | 512.4 (323.0,<br>1083.2)<br>[9]  | 0.73 (0.42 -<br>0.93) | 52.5 (47.1,<br>104.9)<br>[7]  | 45.7 (22.3,<br>72.8)<br>[9]   | 0.65 (0.38 - 0.87) |
| Day<br>4 | 197.5 (117.5,<br>458.5)<br>[9]  | 89.1 (62.5,<br>137.3)<br>[7]  | 0.81 (0.54 -<br>0.96) | 1285.1 (847.1,<br>2170.4)<br>[9]  | 645.3 (477.7,<br>686.0)<br>[6]   | 0.83 (0.56 -<br>0.97) | 142.1 (70.0,<br>156.7)<br>[7] | 45.8 (13.6,<br>72.2)<br>[6]   | 0.76 (0.45 - 0.95) |
| Day<br>5 | 112.0 (94.3,<br>244.1)<br>[6]   | -<br>(1)                      | -                     | 785.5 (473.0,<br>1269.5)<br>[7]   | 348.7 (231.5,<br>466.0)<br>[2]   | 0.86 (0.48 -<br>0.99) | 46.4 (24.8,<br>85.5)<br>[5]   | 102.3 (70.7,<br>133.8)<br>[2] | -                  |

Urine and plasma samples were not available from all patients at all time points. Abbreviations: AUC-ROC, area under the receiver operating characteristics curve; AKI, acute kidney injury; End, end of the surgery. Asterisks mark the time point at which biomarker levels were statistically significantly higher than baseline levels in patients with AKI.

Supplementary Table 4. Characteristics of two study groups of patients with CKD

|                                     | CKD of various etiologies<br>(n=46) | Type 1 Diabetes & Proteinuria<br>(n=124) |
|-------------------------------------|-------------------------------------|------------------------------------------|
| Age (y)                             | 49 ± 2                              | 42 ± 10                                  |
| Male                                | 35 (76%)                            | 72(58%)                                  |
| Race                                |                                     |                                          |
| White                               | 30                                  | 123                                      |
| African American                    | 9                                   | 1                                        |
| Asian & Others                      | 7                                   |                                          |
| sCr (mg/dL)                         | 2.43 ± 0.2                          | 1.39 ± 0.9                               |
| eGFR* (mL/min/1.73 m <sup>2</sup> ) | 41.5 ± 30                           | 68 ± 34                                  |
| Blood KIM-1 (pg/ml)                 |                                     |                                          |
| CKD stage 1                         | 83 ± 55 (p)                         | 89 ± 70 (s)                              |
| CKD stage 2                         | 104 ± 98 (p)                        | 158 ± 173 (s)                            |
| CKD stage 3                         | 201 ± 162 (p)                       | 181 ± 178 (s)                            |
| CKD stage 4                         | 261 ± 126 (p)                       | 288 ± 336 (s)                            |
| CKD stage 5                         | 360 ± 172 (p)                       | 770 ± 770 (s)                            |

*Note:* Values for continuous variables given as mean ± SD; values for categorical variables given as number or number (percentage).

Abbreviations: CKD, chronic kidney injury; eGFR, estimated glomerular filtration rate; sCr, serum creatinine; p, plasma; s, serum.

\* Baseline eGFR was calculated using MDRD equation.

Supplementary Table 5. Various etiologies of chronic kidney disease

---

| <b>Pathology</b>          |                                                                                                                                |
|---------------------------|--------------------------------------------------------------------------------------------------------------------------------|
| <b>Glomerular</b>         | IgA Nephropathy (N=10)<br>Focal glomerulosclerosis (N=4)<br>Membranous Glomerulonephritis (N=5)<br>Lupus (N=2)<br>Others (N=2) |
| <b>Tubulointerstitial</b> | Polycystic kidney disease (N=4)<br>Chronic interstitial toxicity (N=2)<br>Lithium Toxicity (N=2)                               |
| <b>Other</b>              | Diabetes/Hypertension/others (N=15)                                                                                            |

---

Supplementary Figure 1.

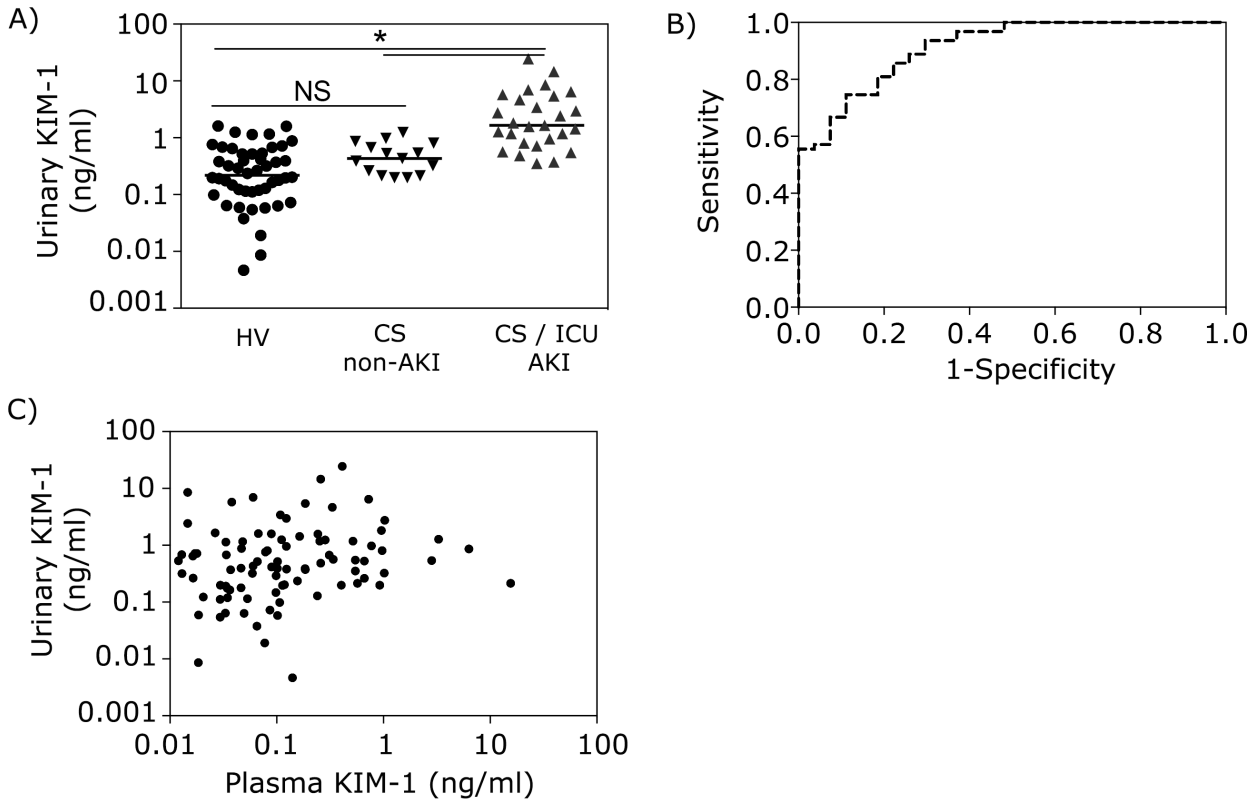

**Supplementary Figure 1. Performance of non-normalized urinary KIM-1.** Plasma and urine were collected from healthy volunteers, post cardiac surgery (CS) patients with or without AKI. (A) Dot plot indicates non-normalized urinary KIM-1 for each subject. \* $p < 0.001$ . (B) ROC curve analysis comparing performance of non-normalized urinary KIM-1 (AUC-0.91; 95%CI: 0.85-0.97,  $p < 0.0001$ ) in patients with and without AKI (HV & CS-ICU non-AKI). (C) Scatter plot of non-normalized urinary KIM-1 levels vs. plasma KIM-1 levels in all subjects including healthy volunteers and cardiac surgery ICU patients with or without AKI. ( $r = 0.23$ ,  $p = 0.025$ ).
